## Progressive alterations in brain connectivity patterns revealed by diffusion-tensor brain networks across severity stages in Alzheimer's disease

1 **J. Rasero<sup>1,2\*</sup>, C. Alonso-Montes<sup>3\*</sup>, I. Diez<sup>2\*</sup>, L. Olabarrieta-Landa<sup>2</sup>, L. Remaki<sup>3</sup>, I. Escudero<sup>2,4</sup>,**  
2 **B. Mateos<sup>2,4</sup>, P. Bonifazi<sup>2,5</sup>, M. Fernandez<sup>2,6</sup>, J.C. Arango-Lasprilla<sup>2,5</sup>, S. Stramaglia<sup>1,3\*\*</sup>, J.M.**  
3 **Cortes<sup>2,5,7\*\*</sup>, for the Alzheimer's Disease Neuroimaging Initiative.**

4

5 <sup>1</sup>Dipartimento di Fisica, Università degli Studi di Bari and INFN. Bari, Italy

6 <sup>2</sup>Biocruces Health Research Institute. Barakaldo, Spain

7 <sup>3</sup>BCAM - Basque Center for Applied Mathematics. Bilbao, Spain

8 <sup>4</sup>Radiology Service. Cruces University Hospital. Barakaldo, Spain

9 <sup>5</sup>IKERBASQUE: The Basque Foundation for Science. Bilbao, Spain

10 <sup>6</sup>Neurology Service. Cruces University Hospital. Barakaldo, Spain

11 <sup>7</sup>Department of Cell Biology and Histology. University of the Basque Country. Leioa, Spain

12

13 **\* Equal first-author contribution**

14 **\*\* Equal last-author contribution**

15 **Keywords:** Diffusion-Tensor Imaging; Brain networks; Alzheimer's disease, Severity progression

16

17

18 **Abstract.** Alzheimer's disease (AD) is a chronically progressive neurodegenerative disease highly  
19 correlated to aging. Whether AD originates by targeting a localized brain area and propagates to the  
20 rest of the brain across disease-severity progression is a question with an unknown answer. Here, this  
21 question is addressed at the group-level by looking to differences in diffusion-tensor brain networks.  
22 In particular, making use of data from Alzheimer's Disease Neuroimaging Initiative (ADNI), 4  
23 different groups were defined (all of them matched by age, sex and education level):  $G_1(N_1 = 36$ ,  
24 healthy control participants, HC),  $G_2(N_2 = 36$ , early mild cognitive impairment, EMCI),  $G_3(N_3 =$   
25  $36$ , late mild cognitive impairment, LMCI) and  $G_4(N_4 = 36$ , AD). We built diffusion-tensor brain  
26 networks and performed group comparison across 3 disease stages: stage I (HC vs EMCI), stage II  
27 (HC vs LMCI) and stage III (HC vs AD). The group comparison was performed using the  
28 multivariate distance matrix regression analysis, a technique that was born in genomics and was  
29 recently proposed to handle functional network data, but here was applied to diffusion-tensor data.  
30 The results were three-fold: First, no significant differences were found in stage I. Second, in stage II,  
31 statistically significant differences were found in the connectivity pattern of a subnetwork strongly  
32 associated to memory function (including part of the hippocampus, amygdala, entorhinal cortex,  
33 fusiform gyrus, inferior and middle temporal gyrus, parahippocampal gyrus and temporal pole).  
34 Third, a widespread disconnection across the entire AD brain was found in stage III, affecting  
35 stronger to the same memory subnetwork appearing in stage II plus to other subnetworks, including  
36 the default mode network, the medial visual network, frontoparietal regions, and subnetworks  
37 encompassing mainly subcortical structures (including part of the hippocampus, amygdala and  
38 putamen). The novelty of the approach lies in the fact that group differences were approached across  
39 severity progression. A better possibility would have been to analyze well time-resolved longitudinal  
40 data, building diffusion-tensor networks belonging to the same patient across all disease stages (from  
41 control to AD), but such data (to the best of our knowledge) are not available yet.

## 42 Introduction

43 Alzheimer's disease (AD), the most common form of dementia, is a chronically progressive  
44 neurodegenerative disease highly correlated to aging; indeed, although the prevalence of clinically  
45 manifested AD is about 2% at the age of 65 years, it increases to about 30% at the age of 85 years  
46 (Wimo et al. 1997).

47 AD is characterized by an accumulation of beta-amyloid plaques and neurofibrillary tangles  
48 composed of tau amyloid fibrils (Hardy 2006) associated with synapse loss and neurodegeneration  
49 leading to long-term memory impairment and other cognitive problems. There is currently no known  
50 treatment that slows down the progression of this disorder.

51 The initial AD pathology develops many years before the cognitive and functional impairments are  
52 evident. Different terms have been used to describe this disease-starting condition, including pre-  
53 dementia and prodromal AD or MCI (mild cognitive impairment). The concept of MCI, a disorder  
54 situated in the spectrum between normal age-related cognitive decline and dementia, has varied over  
55 the past 2 decades. Indeed, MCI has been classified into different broad categories depending on  
56 memory performance and the number of impaired cognitive functions (Mueller *et al.* 2005).

57 An accurate prediction of conversion from MCI to AD can help to clinicians to evaluate AD risk pre-  
58 symptomatically, initiate treatments at early stage, and monitor their effectiveness (Cheng *et al.*  
59 2015, Li *et al.* 2014). However, the group of MCI is highly heterogeneous, and not all MCI patients  
60 convert to AD (Ritter *et al.* 2015). Indeed, the annual rate in which MCI progresses to dementia  
61 varies between 8% and 15% per year (Mitchell and Shiri-Feshki 2009). The amnesic subtype of MCI  
62 is more prevalent than non-amnesic one (Petersen *et al.* 2010), and it has a significantly higher  
63 annual conversion rate to AD, between 30% (Schmidtke and Hermeneit 2008, Rozzini *et al.* 2007) to  
64 40% (Geslani *et al.* 2005).

## Progressive brain disconnection in AD

65 This study aims to search for neuroimaging biomarkers that can account for differences with respect  
66 to a healthy control (HC) population from the early to the final stages of AD. Multitude of different  
67 neuroimaging studies has addressed the conversion from MCI to AD, see (Zhang *et al.* 2014) and  
68 references therein. In relation to structural magnetic resonance imaging (MRI), it was shown that the  
69 hippocampus volume and the volume from other subcortical structures at MCI were well correlated  
70 to a worse progression to AD, with accuracy of about 65% in the prediction from MCI to AD (Teipel  
71 *et al.* 2015).

72 Rather than assuming that specific brain regions are going to be affected by AD, other authors  
73 achieved a better accuracy in the prediction from MCI to AD (achieving values of about 80%  
74 accuracy) by performing a blind approach including multiple regions of interest (Westman *et al.*  
75 2011, Eskildsen *et al.* 2013, Liu *et al.* 2013). The use of Tensor Diffusion MRI in combination with  
76 structural MRI has provided better results as compared to solely structural MRI, finding that white-  
77 matter integrity of the fornix, cingulum, and parahippocampal gyrus provided accuracy varying from  
78 80% to even 95% (Wee *et al.* 2013, Mielke *et al.* 2012, Douaud *et al.* 2013).

79 Initiatives like the Alzheimer's Disease Neuroimaging Initiative (ADNI) provide open access to the  
80 research community to important material and resources (demographic data, imaging datasets,  
81 cognitive tests, etc.) to study AD, pushing forward studies correlating different imaging modalities to  
82 the neuropsychological disease's status. Interestingly, ADNI also allows the possibility of studying  
83 variations in the images across disease's progression, as brain images are categorized in different  
84 groups ranging from HC to AD, with two intermediate stages, early and late mild cognitive  
85 impairment, EMCI and LMCI, respectively. Albeit EMCI and LMCI patients have some memory  
86 impairment beyond the standard dysfunction associated exclusively to aging or education level  
87 (Medina *et al.* 2006), the conversion rate to AD is only of 5-10% per year (Mitchell and Shiri-Feshki

88 2009). Thus, this group of individuals become of special importance in the searching for new  
89 imaging markers that can correlate with disease progression.

90 Despite extensive research shedding light into this problem, the precise mechanisms and clinical  
91 variables responsible for the progression from MCI to AD have not been fully characterized, mainly  
92 due to the lack of time-resolved longitudinal studies in large populations. Here, motivated by  
93 previous work (Khedher *et al.* 2015, Douaud *et al.* 2011, Bosch *et al.* 2012, Liu *et al.* 2013, Acosta-  
94 Cabronero *et al.* 2012, Preti *et al.* 2012), the study focuses on the variations of brain networks across  
95 the AD progression, and it is hypothesized that, if in the transition from HC to MCI the connectivity  
96 pattern of some subnetworks is altered, it will propagate to the rest of the AD brain.

97

## 98 **Material and Methods**

### 99 **2.1 Alzheimer's Disease Neuroimaging Initiative (ADNI)**

100 The DTI images used in this paper were obtained from ADNI database <http://adni.loni.usc.edu>.  
101 ADNI was launched in 2003 by the Nat. Inst. on Aging (NIA), the Nat. Inst. Biomedical Imaging and  
102 Bioengineering (NIBIB), the Food and Drug Administration (FDA), private pharmaceutical  
103 companies and non-profit organizations, as a \$60 million, 5-year public-private partnership. ADNI's  
104 main goal has been to test whether serial MRI, positron emission tomography (PET), other biological  
105 markers, and clinical and neuropsychological assessment can be combined to measure the  
106 progression of MCI and early AD. Determination of sensitive and specific markers of very early AD  
107 progression is intended to aid researchers and clinicians to develop new treatments and monitor their  
108 effectiveness, as well as to lessen the time and cost of clinical trials. The Principal Investigator of this  
109 initiative is Michael W. Weiner, MD, VA Medical Center and Univ. California – San Francisco.

## Progressive brain disconnection in AD

110 ADNI subjects have been recruited from over 50 sites across the U.S. and Canada. Currently, around  
111 1500 adults were recruited in the different ADNI initiatives, ages 55 to 90, consisting of cognitively  
112 normal older (NC), early/late MCI (EMCI/LMCI), significant memory concern (SMC) and early AD  
113 (AD) individuals. The follow up duration of each group is specified in the protocols for ADNI-1,  
114 ADNI-2 and ADNI-GO, see further information in [www.adni-info.org](http://www.adni-info.org) .

115

### 116 **2.2 Demographic Data**

117 A total number of N=144 subjects were used in this study (Table I). This number was chosen in order  
118 to get the biggest 4 groups as possible (HC, EMCI, LMCI and AD), balanced by size, age and sex.  
119 DTI images were selected and downloaded from ADNI database, belonging to 4 different groups:  
120 HC (N<sub>1</sub>=36), EMCI (N<sub>2</sub>=36), LMCI (N<sub>3</sub>=36) and AD (N<sub>4</sub>=36). Age and sex were balanced across  
121 groups (Table II), respectively, using a t-test and chi-squared test. In addition, it is important to  
122 remark that the “years of education” variable was already controlled by the ADNI group  
123 classification, for details see Inclusion criteria in page 31 of [https://adni.loni.usc.edu/wp-](https://adni.loni.usc.edu/wp-content/uploads/2008/07/adni2-procedures-manual.pdf)  
124 [content/uploads/2008/07/adni2-procedures-manual.pdf](https://adni.loni.usc.edu/wp-content/uploads/2008/07/adni2-procedures-manual.pdf)

125

### 126 **2.3 ADNI group classification**

127 The group labels HC, EMCI, LMCI and AD are based on several test scores, such as the Logical  
128 Memory II subscale (LMIIS) from the Wechsler Memory Scale, the Mini-Mental State Examination  
129 (MMSE) and the Clinical Dementia Rating (CDR), as well as National Institute of Neurological and  
130 Communicative Disorders and Stroke and the AD and Related Disorders Association

131 (NINCDS/ADRDA) criteria in AD cases. In the procedures manual each of the criteria are cited  
132 (<http://adni.loni.usc.edu/wp-content/uploads/2008/07/adni2-procedures-manual.pdf>).

133 HC subjects are free of memory complaints (beyond what expected due to age), verified by a study  
134 partner. EMCI, LMCI and AD must have a subjective memory concern as reported by subject, study  
135 partner, or clinician. Details of specific groups are given in Table III.

136

#### 137 **2.4 Group-level stages for AD progression**

138 AD progression was defined by three different stages: stage I (control vs EMCI), stage II (control vs  
139 LMCI) and stage III (control vs AD). More details in Figure 1.

140

#### 141 **2.5 DTI acquisitions**

142 All subjects in this study had the same ADNI imaging protocol, explained in  
143 <http://adni.loni.usc.edu/methods/documents/mri-protocols/> and consisting in whole-brain MRI 3T  
144 scanners and Diffusion Weighted Images (DWI) images of the axial DTI series. The DTI images  
145 were acquired using spin echo pulse sequence echo-planar-imaging (SE-EPI) with the following  
146 parameters: TR = 9050.0 ms; TE set to minimum (values ranging from 60 ms till 69 ms); 59 slices  
147 with thickness of 2.7 mm with no gap among slices; 128x128 matrix with a FOV of 35.0 cm; with  
148 matrix pixels 256x256x2714 and voxel size 1.36x1.36x2.7 mm<sup>3</sup>, flip angle = 90°. A diffusion  
149 gradient was applied along 41 non-collinear directions with a b value of 1000 s/mm<sup>2</sup>. Additionally,  
150 one set of images was acquired with no diffusion weighting (b= 0 s/mm<sup>2</sup>).

151

## 152 **2.6 Diffusion tensor brain networks**

153 To build diffusion tensor brain networks a similar methodology as in previous work was followed  
154 (Diez *et al.* 2015, Alonso-Montes *et al.* 2015, Amor *et al.* 2015) using FSL (FMRIB Software  
155 Library v5.0) and the Diffusion Toolkit. First, all the selected images were downloaded in DICOM  
156 and transformed to Nifti format for further analysis. Next, an eddy current correction was applied to  
157 overcome the artifacts produced by variation in the gradient field directions, together with the  
158 artifacts produced by head movements. Next, using the corrected data, a local fitting of the diffusion  
159 tensor was applied to compute the diffusion tensor model for each voxel. Next, a Fiber Assignment  
160 by Continuous Tracking (FACT) algorithm was applied (Mori *et al.* 1999). Then a transformation  
161 from the Montreal Neurological Institute (MNI) space to the individual-subject diffusion space was  
162 applied and projected the brain hierarchical atlas (available to download at  
163 [http://www.nitrc.org/projects/biocr\\_hcatlas/](http://www.nitrc.org/projects/biocr_hcatlas/)). In particular, M=20 modules were considered that was  
164 shown in (Diez *et al.* 2015) to best-match functional connectivity modules with structural ones. This  
165 allowed building 20 x 20 structural connectivity (SC) matrices, each per subject, by counting the  
166 number of white matter streamlines connecting all module pairs. Thus, the element matrix  $(i,j)$  of SC  
167 is given by the streamlines number between modules  $i$  and  $j$ . As a result, SC is a symmetric matrix,  
168 where connectivity from  $i$  to  $j$  is equal to that from  $j$  to  $i$ .

169

## 170 **2.6 Cross-group analysis: Multivariate Distance Matrix Regression**

171 The cross-group analysis has been performed using the Multivariate Distance Matrix Regression  
172 (MDMR) approach proposed in (Shehzad *et al.* 2014). Based on the hypothesis that at the early  
173 stages of the AD progression, if some subnetworks disconnect will propagate at further stages to the  
174 rest of the brain, a multivariate distance regression was chosen to apply, which allows testing the



175 variation of distance in connectivity patterns between groups as a response of the Alzheimer's  
176 progression as compared to the HC state. For a fixed brain module  $i$ , the distance between  
177 connectivity patterns of module  $i$  to the rest of the brain was calculated per pair of subjects ( $u,v$ ) --by  
178 calculating Pearson correlation between connectivity vectors of subject pairs--, thus leading to a  
179 distance matrix in the subject space for each module  $i$  investigated. In particular, the following  
180 formula was calculated

$$181 \quad d_{uv}^i = \sqrt{2 \cdot (1 - r_{uv})} \quad (\text{Eq. 1})$$

182 where  $r_{uv}$  is the Pearson correlation between connectivity patterns of  $i$  for subjects  $u$  and  $v$ . After  
183 repeating the same procedure for all subjects, as many distance matrices as partition modules  
184 ( $i = 1, \dots, 20$ ) were obtained. Next, MDMR was applied to perform cross-group analysis as  
185 implemented in R (McArtor 2016).

186 It is important to emphasize that NDMR does not look to how individual modules are locally  
187 organized or connected, but to the integration connectivity pattern between those segregated modules  
188 to the rest of the brain. Therefore, when NDMR finds group differences in a given module, this  
189 means that the connectivity alterations from that module are being propagated to the rest of the brain.

190 MDMR yielded a pseudo-F estimator (analogous to that F-estimator in standard ANOVA analysis),  
191 which addresses significance of disease strength due to between-group variation as compared to  
192 within-group variations (McArdle and Anderson 2001). To compare between groups when the  
193 regressor variable is categorical (*i.e.* the group label), given a distance matrix, one can calculate the  
194 total sum of squares as

$$195 \quad SS_T = \frac{1}{N} \sum_{u=1} \sum_{v=1+1} d_{uv}^2, \quad (\text{Eq. 2})$$

196 with  $N$  being the total number of subjects. Notice that, from here on, we will consider  $d_{uv} \equiv d_{uv}^i$ .  
197 Thus, we got a different  $SS_T$  for each module  $i$ . Similarly, the within-group sum of squares can be  
198 written as

$$199 \quad SS_W = \sum \frac{1}{n_g} \sum_{u=1} \sum_{v=u+1} d_{uv}^2 \varepsilon_{uv}^g, \quad (\text{Eq. 3})$$

200 where  $n_g$  is the number of subjects per group and  $\varepsilon_{uv}^g$  a variable equal to 1 if subjects  $u$  and  $v$  belong  
201 to group  $g$  and 0 otherwise. The between-group variation is simply  $SS_A = SS_T - SS_W$ , which leads  
202 to a pseudo-F statistic that reads

$$203 \quad F = \frac{SS_A/(m-1)}{SS_W/(N-m)} \quad (\text{Eq. 4})$$

204 where  $m$  is the number of groups. As it was acknowledged in (Zapala and Schork 2006), the pseudo-  
205 F statistic is not distributed like the usual Fisher's F-distribution under the null hypothesis.  
206 Accordingly, we randomly shuffled the subject indices and computed the pseudo-F statistic for each  
207 time. A p-value is computed by counting those pseudo F-statistic values from permuted data greater  
208 than that from the original data respect to the total number of performed permutations.

209 Finally, we controlled for type I errors due to the 20 independent statistical performed tests by false  
210 discovery rate corrections (Benjamini and Hochberg 1995). Corrected whole-brain connectivity  
211 patterns of modules are the ones related to AD progression at the different stages. An schematic  
212 overview of the method can be found in Figure 2.

213

### 214 **3. Results**

215 Results are summarized in Table IV and modules involved in the disease progression are shown in  
216 Figure 3. See also Table V for some examples of the different terms participating in the statistical  
217 test.

218

### 219 **3.1 Stage I: HC vs EMCI**

220 A total number of 36 images per each group were selected to perform group comparison. No  
221 significant differences were found in terms of module connectivity patterns to the whole brain.

222

### 223 **3.2 Stage II: HC vs LMCI**

224 A total number of 36 images per each group were selected to perform group comparison. Significant  
225 differences were found for the connectivity between the module 18 and the rest of the brain  
226 ( $p=0.007$ ). As detailed in (27), the module 18 of the brain hierarchical atlas consisted in part of the  
227 hippocampus, amygdala, entorhinal cortex, fusiform gyrus, inferior temporal gyrus, middle temporal  
228 gyrus, parahippocampal gyrus and temporal pole.

229

### 230 **3.3 Stage III: HC vs AD**

231 A total number of 36 images per each group were selected to perform group comparison. For this  
232 situation, the number of significantly different connectivity patterns was found in multiple modules  
233 from the brain hierarchical atlas:

234 Module 1 ( $p=0.023$ ); including part of the posterior cingulate.

## Progressive brain disconnection in AD

235 Module 2 ( $p=0.049$ ); including part of the putamen, anterior cingulate, rostral pars of the middle  
236 frontal gyrus, superior parietal gyrus, supramarginal gyrus, insula, inferior parietal gyrus, precentral  
237 gyrus and superior frontal gyrus.

238 Module 3 ( $p=0.049$ ); part of the paracentral lobe, precentral gyrus, postcentral gyrus, precuneus,  
239 superior frontal gyrus, superior parietal gyrus, superior temporal gyrus, supramarginal gyrus and  
240 insula.

241 Module 4 ( $p=0.031$ ); part of the cuneus, lateral occipital sulcus, lingual gyrus, pericalcarine cortex  
242 and precuneus.

243 Module 8 ( $p=0.031$ ); part of the caudate nucleus and putamen.

244 Module 12 ( $p=0.031$ ); part of the inferior parietal gyrus, inferior temporal gyrus, lateral frontal  
245 orbital gyrus, pars orbitalis, pars triangularis, rostral pars of the middle frontal gyrus, superior frontal  
246 gyrus, caudate nucleus and anterior cingulate.

247 Module 14 ( $p=0.006$ ); part of the thalamus, hippocampus, amygdala, putamen, ventral  
248 diencephalon, banks of the superior temporal sulcus, parahippocampal gyrus, superior temporal  
249 gyrus, insula, middle temporal gyrus and temporal pole.

250 Module 15 ( $p=0.031$ ); part of the thalamus, putamen, pallidum, brainstem, hippocampus, amygdala,  
251 accumbens nucleus, ventral diencephalon, orbital gyrus and insula.

252 Module 16 ( $p=0.031$ ); part of the cerebellum, banks of the superior temporal sulcus, inferior parietal  
253 gyrus, cingulate isthmus, middle temporal gyrus, precuneus and superior temporal gyrus.

254 Module 18 ( $p=0.002$ ); see previous 3.2 section for the anatomical description, but notice a reduction  
255 in p value from 0.007 (HC vs LMCI) to 0.002 (HC vs AD).

256

### 257 **3.4 Common affected modules between stages**

258 Connectivity pattern of module 18 to the rest of the brain was found at stage II ( $p=0.007$ ) and at stage  
259 III ( $p=0.002$ ), indicating that the further the disease progresses, the greater the connectivity of  
260 module 18 is altered to the rest of the brain.

261

## 262 **4. Discussion**

263 The aim of the study was to identify differences in brain connectivity patterns between three groups  
264 with different disease severity and a control group. For this purpose, diffusion tensor brain networks  
265 were built allowing determining connectivity differences at three consecutive disease stages: stage I  
266 (HC vs EMCI), stage II (HC vs LMCI) and stage III (HC vs AD).

267 The results showed an absence of significant changes in connectivity patterns in stage I, that is,  
268 between patients with early mild cognitive impairment and healthy individuals. The approach we  
269 have applied, the Multivariate Distance Matrix Regression (MDMR) analysis, finds group  
270 differences in the connectivity patterns from different modules to the rest of the brain. Therefore, at  
271 very early mild cognitive impairment, although possible structural damages might occur locally, they  
272 are not capable to produce global inter-module network reorganization/redistribution that can be  
273 measured by the NDMR analysis.

274 However, significant differences were found by the MDMR method in stage II to a network involved  
275 with memory (module 18), which includes the hippocampus, amygdala, entorhinal cortex, fusiform  
276 gyrus, inferior temporal gyrus, mean temporal gyrus, parahippocampal gyrus and the temporal pole,  
277 among patients with late mild cognitive impairment and healthy individuals. This change in

## Progressive brain disconnection in AD

278 connectivity in module 18 becomes more evident in patients with AD. Finally, a multitude of  
279 different modules are connected differently in AD as compared to healthy subjects (modules 1-4, 8,  
280 12, 14-16 and 18), including the default mode network, the sensory-motor network, the medial visual  
281 network, frontoparietal regions and networks that mainly encompass subcortical structures (including  
282 part of the hippocampus, amygdala and putamen).

283 The brain connectivity changes found in this study in stage II might be related to the appearance of  
284 several cognitive manifestations, which are typical of AD. For example, many studies have  
285 determined the main cognitive impairment in the preclinical phase of AD is episodic memory  
286 (Almkvist, 1996, Arnaiz et al., 2003; Albert et al., 2001; Bäckman et al., 2004, 2005; Grober et al.,  
287 2008), in which hippocampal formation, entorhinal cortex, amygdala and hypothalamus are involved;  
288 that is, regions of the temporal-medial lobe which are regions affected before AD can be clinically  
289 diagnosed (Almkvist, 1996; Bäckman et al., 2004, 2005; Small et al., 1999; Estévez-González et al.,  
290 2003; Small et al., 2003). In addition, it is known that the initial neuronal lesions in AD also begin in  
291 the entorhinal region (included in module 18, therefore, in agreement with our results) with the  
292 accumulation of neurofibrillary tangles and neuritic plaques (Gómez-Isla et al., 1996).

293 Although alterations of the episodic memory are considered the most critical ones at the preclinical  
294 phase (Small, et al., 2003; Storandt, 2008) and tasks that measure episodic memory have been shown  
295 to be particularly effective at identifying people at risk for developing AD (Elias et al., 2000; Tierney  
296 et al., 1996), studies have shown that people with mild cognitive impairment who have altered  
297 episodic memory and other cognitive areas such as verbal ability (Apostolova et al., 2008; Arnaiz et  
298 al et al., 2003; Bäckman et al., 2004, 2005; Joubert et al., 2010), executive functions (Albert et al.,  
299 2001; Bäckman et al., 2004, 2005; Dickerson et al., 2007; Grober et al., 2008; Storandt, 2008;  
300 Blacker et al., 2007; Rapp et al., 2005), perceptual speed (Bäckman et al., 2005), Visuo-spatial /  
301 visuoperceptive skills (Almkvist, 1996, Arnaiz et al., 2003; Bäckman et al., 2004, 2005; Alegret et

302 al., 2009), attention (Bäckman et al., 2005; Rapp et al., 2005), etc. are more likely to convert to AD  
303 than those with only memory impairment (Bozoki et al., 2001). As indicated by Bäckman et al.  
304 (2004, 2005), some studies suggest that other areas in addition to the ones in temporal-medial lobe  
305 are altered prior to the diagnosis of AD, such as volume reduction of anterior cingulate and temporal  
306 sulcus, posterior cingulate, temporoparietal regions, frontal regions; decreased blood flow in the  
307 posterior cingulate and precuneus, reduced glucose in temporoparietal regions and deposition of  
308 amyloid plaques in the temporal and frontal cortex. This may explain why studies attempting to find  
309 cognitive markers of the AD preclinical stage find alterations in other cognitive functions apart from  
310 episodic memory.

311 As the disease progresses, not only the disconnection pattern of module 18 becomes more evident  
312 (increasing the distance between AD and controls, Table IV), but such significant changes extend to  
313 other brain regions. For example, areas of the hippocampus affected by module 14 are well known to  
314 suffer a very severe cognitive degeneration, a fact also confirmed by functional connectivity studies  
315 (Zhou *et al.* 2008). The results also indicate a significant connectivity change with temporal medial  
316 areas, as revealed by module 16, as shown in Tract Based Spatial Statistics at (Stricker *et al.* 2009,  
317 Acosta-Cabronero *et al.* 2010, Salat *et al.* 2010). The authors of (He *et al.* 2007) demonstrated,  
318 through a combined structural and functional analysis, changes in connectivity between the lingual  
319 and cuneus, confirming the results of this study obtained exclusively from structural connectivity  
320 data. At the same time, the results indicate a significant change in the connectivity of the entire brain  
321 to the areas provided by module 4, mainly affected by visual functions. For example, a decrease in  
322 virtual capacity due to AD is well known, especially in those areas involving movement blindness,  
323 depth perception, color perception and contrast sensitivity (Whittaker *et al.* 2002). Again, this  
324 damage expansion to other brain regions also agrees with the extent and worsening of cognitive  
325 aspects (e.g., memory, attention, language; Weintraub *et al.* 2012) and neurobehavioral problems

## Progressive brain disconnection in AD

326 (e.g. personality changes, anxiety, depression, agitation, hallucinations; Chung & Cummings, 2000,  
327 Bassiony et al., 2000, Senanarong et al., 2003) of patients with AD.

328 Previous studies have analyzed the connectivity differences from tensor diffusion networks in AD  
329 and have found significant alterations in the inferior longitudinal fasciculus for patients at risk of AD  
330 (Smith *et al.* 2010), which could correspond to LMCI. Similarly, a voxel-based analysis in (Honea *et*  
331 *al.* 2009) showed a significant decrease in FA for fibers connecting the parahippocampal gyrus. In  
332 addition, patients diagnosed in the early stages of AD (corresponding to early or late mild cognitive  
333 impairment in this study) had a significant reduction in white matter in the upper longitudinal  
334 fasciculus, which also connects part of module 18 in the brain hierarchical atlas with the frontal lobe  
335 (Rose *et al.* 2000). The authors (Hanyu *et al.* 1998) found significant changes in apparent diffusion  
336 coefficients and diffusion anisotropy in patients with recent progressive cognitive impairment,  
337 suggesting an early decrease in temporal fiber density, a region included in the module 18, therefore  
338 in concordance to our results.

339

### 340 Implications

341 In recent years a great deal of emphasis has been placed on the early AD detection (Albert et al.,  
342 2001). The results of this study have great clinical implications since the analysis of cerebral  
343 connectivity could help in the early diagnosis of the disease. This early detection would help to look  
344 for pharmacological or non-pharmacological treatment methods to help delay the age of disease onset  
345 or to slow down the clinical disease progression.

346 On the other hand, identifying the brain connection patterns in those patients who have not yet  
347 developed AD, will allow us to know the changes that occur in these connectivity patterns over time.



348 In addition, it will be possible to associate those connectivity patterns with clinical patient's changes  
349 present at each disease stage. This might help to better understand the relationship between  
350 deterioration in brain functioning and the clinical patient's characteristics.

### 351 Limitations

352 The results of the present study should be interpreted in light of the following limitations. First, it is a  
353 cross-sectional study with different groups of people in each experimental group and with a small  
354 sample size, so future studies should try to extend to bigger cohorts and follow the same group of  
355 people over time as the disease progresses. Second, the patients included in the study have a probable  
356 AD, which means that the definitive diagnosis of AD can only be performed post-mortem (Fearing et  
357 al., 2007). The use of patients with familial AD could help to know in depth the evolution of the  
358 disease and the changes in cerebral connectivity from many years back to its onset. Third, there are a  
359 number of risk factors associated with the decline of mild cognitive impairment which can affect  
360 brain connectivity such as advanced diabetes, symptomatology depressive disorder, hypertension,  
361 hypotension, obesity, history of traumatic brain injury and APOE genotype, that have not been taken  
362 into account in this study. Future studies should take into account the possible influence of these  
363 variables on the processes of cerebral connectivity.

364 In conclusion, the deterioration of cerebral connectivity is evident and is in line with the evolution of  
365 AD from both the neuropathological and neuropsychological point of view. That is, the first cerebral  
366 connectivity changes occur in the regions of the middle temporal lobe (hippocampus and entorhinal),  
367 which coincides with the first symptoms of altered episodic memory in the preclinical stage and in  
368 mild cognitive impairment. As the disease progresses, the brain damage and its disconnection of  
369 these regions become more evident and expands to other areas, which coincides with the expansion

## Progressive brain disconnection in AD

370 and/or worsening of other cognitive functions and neurobehavioral aspects seen in the individuals  
371 with AD.

372 **Author Contributions**

373 JR, CAM and ID had equal first-author contribution; JR, CAM and ID analyzed the data and made  
374 the figures; LOL and JCAL connected results to cognitive deficits in AD; LR, IE, BM, PB, MF,  
375 JCAL, SS and JMC designed the research; all the authors wrote the manuscript and agreed in its  
376 submission; SS and JMC had equal last author contributions

377

378 **Acknowledgements**

379 SS acknowledges financial support from Bizkaia Talent and European Commission through  
380 COFUND with the research project BRAhMS – Brain Aura Mathematical Simulation– (AYD-000-  
381 285). JR acknowledges financial support from the Minister of  
382 Education, Language Policy and Culture (Basque Government) under  
383 Doctoral Research Staff Improvement Programme. JMC and JCAL acknowledge financial support  
384 from grant DPI2016-79874-R from Ministerio Economía, Industria y Competitividad (Spain) and  
385 FEDER. JMC, JCAL and PB acknowledge financial support from Ikerbasque: The Basque  
386 Foundation for Science.

387

388 **References**

- 389 Acosta-Cabronero, J., Alley, S., Williams, G. B., Pengas, G. & Nestor, P. J. Diffusion Tensor Metrics  
390 as Biomarkers in Alzheimer's Disease. PLOS ONE 7, e49072 (2012).
- 391 Acosta-Cabronero, J., Williams, G. B., Pengas, G. & Nestor, P. J. Absolute diffusivities define the  
392 landscape of white matter degeneration in Alzheimer's disease. Brain 133, 529–539 (2010).
- 393 Albert, M. S., Moss, M. B., Tanzi, R., & Jones, K. (2001). Preclinical prediction of AD using  
394 neuropsychological tests. Journal of the International Neuropsychological Society, 7(05), 631-639.
- 395 Alegret, M., Boada-Rovira, M., Vinyes-Junqué, G., Valero, S., Espinosa, A., Hernández, I., ... &  
396 Tárraga, L. (2009). Detection of visuoperceptual deficits in preclinical and mild Alzheimer's disease.  
397 Journal of clinical and experimental neuropsychology, 31(7), 860-867.
- 398 Almkvist, O. (1996). Neuropsychological features of early Alzheimer's disease: preclinical and  
399 clinical stages. Acta Neurologica Scandinavica, 94(S165), 63-71.
- 400 Alonso-Montes, C. et al. Lagged and instantaneous dynamical influences related to brain structural  
401 connectivity. Front. Psychol. 6, (2015).
- 402 Amor, T. A. et al. Extreme brain events: Higher-order statistics of brain resting activity and its  
403 relation with structural connectivity. EPL Europhys. Lett. 111, 68007 (2015).
- 404 Apostolova, L. G., Lu, P., Rogers, S., Dutton, R. A., Hayashi, K. M., Toga, A. W., ... & Thompson,  
405 P. M. (2008). 3D mapping of language networks in clinical and pre-clinical Alzheimer's disease.  
406 Brain and language, 104(1), 33-41.
- 407 Arnáiz, E., & Almkvist, O. (2003). Neuropsychological features of mild cognitive impairment and  
408 preclinical Alzheimer's disease. Acta Neurologica Scandinavica, 107(s179), 34-41.

- 409 Bassiony, M. M., Steinberg, M. S., Warren, A., Rosenblatt, A., Baker, A. S., & Lyketsos, C. G.  
410 (2000). Delusions and hallucinations in Alzheimer's disease: prevalence and clinical correlates.  
411 *International journal of geriatric psychiatry*, 15(2), 99-107.
- 412 Benjamini, Y. & Hochberg, Y. Controlling the False Discovery Rate: A Practical and Powerful  
413 Approach to Multiple Testing. *J. R. Stat. Soc. Ser. B Methodol.* 57, 289–300 (1995).
- 414 Blacker, D., Lee, H., Muzikansky, A., Martin, E. C., Tanzi, R., McArdle, J. J., ... & Albert, M.  
415 (2007). Neuropsychological measures in normal individuals that predict subsequent cognitive  
416 decline. *Archives of neurology*, 64(6), 862-871.
- 417 Bosch, B. et al. Multiple DTI index analysis in normal aging, amnesic MCI and AD. Relationship  
418 with neuropsychological performance. *Neurobiol. Aging* 33, 61–74 (2012).
- 419 Bozoki, A., Giordani, B., Heidebrink, J. L., Berent, S., & Foster, N. L. (2001). Mild cognitive  
420 impairments predict dementia in nondemented elderly patients with memory loss. *Archives of*  
421 *Neurology*, 58, 411–416.
- 422 Bäckman, L., Jones, S., Berger, A. K., Laukka, E. J., & Small, B. (2004). Multiple cognitive deficits  
423 during the transition to Alzheimer's disease. *Journal of internal medicine*, 256(3), 195-204.
- 424 Bäckman, L., Jones, S., Berger, A. K., Laukka, E. J., & Small, B. J. (2005). Cognitive impairment in  
425 preclinical Alzheimer's disease: a meta-analysis. *Neuropsychology*, 19(4), 520.
- 426 Cerhan, J. H., Ivnik, R. J., Smith, G. E., Machulda, M. M., Boeve, B. F., Knopman, D. S., ... &  
427 Tangalos, E. G. (2007). Alzheimer's disease patients' cognitive status and course years prior to  
428 symptom recognition. *Aging, Neuropsychology, and Cognition*, 14(3), 227-235.
- 429 Cheng, B. et al. Multimodal manifold-regularized transfer learning for MCI conversion prediction.

- 430 Brain Imaging Behav. 9, 913–926 (2015).
- 431 Chung, J. A., & Cummings, J. L. (2000). Neurobehavioral and neuropsychiatric symptoms in  
432 Alzheimer's disease. *Neurologic clinics*, 18(4), 829-846.
- 433 Daniel B. McArtor, D. B. M. MDMR: Multivariate Distance Matrix Regression. (2016).
- 434 Dickerson, B. C., Sperling, R. A., Hyman, B. T., Albert, M. S., & Blacker, D. (2007). Clinical  
435 prediction of Alzheimer disease dementia across the spectrum of mild cognitive impairment.  
436 *Archives of General Psychiatry*, 64(12), 1443-1450.
- 437 Diez, I. et al. A novel brain partition highlights the modular skeleton shared by structure and  
438 function. *Sci. Rep.* 5, 10532 (2015).
- 439 Douaud, G. et al. Brain Microstructure Reveals Early Abnormalities more than Two Years prior to  
440 Clinical Progression from Mild Cognitive Impairment to Alzheimer's Disease. *J. Neurosci.* 33, 2147–  
441 2155 (2013).
- 442 Douaud, G. et al. DTI measures in crossing-fibre areas: increased diffusion anisotropy reveals early  
443 white matter alteration in MCI and mild Alzheimer's disease. *NeuroImage* 55, 880–890 (2011).
- 444 Elias, M. F., Beiser, A., Wolf, P. A., Au, R., White, R. F., & D'Agostino, R. B. (2000). The  
445 preclinical phase of Alzheimer's disease: A 22-year prospective study of the Framingham cohort.  
446 *Archives of Neurology*, 57, 808–813.
- 447 Eskildsen, S. F. et al. Prediction of Alzheimer's disease in subjects with mild cognitive impairment  
448 from the ADNI cohort using patterns of cortical thinning. *NeuroImage* 65, 511–521 (2013).
- 449 Estevez González, A., Kulisevsky, J., Boltes, A., Otermin, P., García-Sánchez, C. Rey. Verbal  
450 Learning test is a useful tool for differential diagnosis in the preclinical phase of Alzheimer's disease:

- 451 comparison with mild cognitive impairment and normal aging. *Int J Geriatr Psychiatry* 2003; 18 (11):  
452 1021-8.
- 453 Fearing, M.A., Bigler, E.D., Norton, M., Tschanz, J.A., Hulette, C., Leslie, C., Welsh-Bohmer, K., &  
454 Cache County Investigators (2007). Autopsy-confirmed Alzheimer's disease versus clinically  
455 diagnosed Alzheimer's disease in the Cache County Study on Memory and Aging: a comparison of  
456 quantitative MRI and neuropsychological findings. *Journal of Clinical and Experimental*  
457 *Neuropsychology*, 29(5): 553-560
- 458 Geslani, D. M., Tierney, M. C., Herrmann, N. & Szalai, J. P. Mild cognitive impairment: an  
459 operational definition and its conversion rate to Alzheimer's disease. *Dement. Geriatr. Cogn. Disord.*  
460 19, 383–389 (2005).
- 461 Gomez-Isla, T., Price, J., McKeel, D., Morris, J., Growdon, J., & Hyman, B. (1996). Profound loss of  
462 layer II entorhinal cortex neurons occurs in very mild Alzheimer's disease. *Journal of Neuroscience*,  
463 16, 4491– 4500.
- 464 Grober, E., Hall, C. B., Lipton, R. B., Zonderman, A. B., Resnick, S. M., & Kawas, C. (2008).  
465 Memory impairment, executive dysfunction, and intellectual decline in preclinical Alzheimer's  
466 disease. *Journal of the International Neuropsychological Society*, 14(02), 266-278.
- 467 Hanyu, H. et al. Diffusion-weighted MR imaging of the hippocampus and temporal white matter in  
468 Alzheimer's disease. *J. Neurol. Sci.* 156, 195–200 (1998).
- 469 Hardy, J. Alzheimer's disease: the amyloid cascade hypothesis: an update and reappraisal. *J.*  
470 *Alzheimers Dis. JAD* 9, 151–153 (2006).
- 471 Honea, R. A., Vidoni, E., Harsha, A. & Burns, J. M. Impact of APOE on the Healthy Aging Brain: A  
472 Voxel-Based MRI and DTI Study. *J. Alzheimers Dis. JAD* 18, 553–564 (2009).

## Progressive brain disconnection in AD

- 473 Joubert, S., Brambati, S. M., Ansado, J., Barbeau, E. J., Felician, O., Didic, M., ... & Kergoat, M. J.  
474 (2010). The cognitive and neural expression of semantic memory impairment in mild cognitive  
475 impairment and early Alzheimer's disease. *Neuropsychologia*, 48(4), 978-988.
- 476 Khedher, L., Ramírez, J., Górriz, J. M., Brahim, A. & Segovia, F. Early diagnosis of Alzheimer's  
477 disease based on partial least squares, principal component analysis and support vector machine  
478 using segmented MRI images. *Neurocomputing* 151, Part 1, 139–150 (2015).
- 479 Li, H. et al. Hierarchical Interactions Model for Predicting Mild Cognitive Impairment (MCI) to  
480 Alzheimer's Disease (AD) Conversion. *PLOS ONE* 9, e82450 (2014).
- 481 Liu, J. et al. White Matter Changes in Patients with Amnesic Mild Cognitive Impairment Detected  
482 by Diffusion Tensor Imaging. *PLOS ONE* 8, e59440 (2013).
- 483 Liu, Y. et al. Predicting AD Conversion: Comparison between Prodromal AD Guidelines and  
484 Computer Assisted PredictAD Tool. *PLOS ONE* 8, e55246 (2013).
- 485 McArdle, B. H. & Anderson, M. J. Fitting Multivariate Models to Community Data: A Comment on  
486 Distance-Based Redundancy Analysis. *Ecology* 82, 290–297 (2001).
- 487 Medina, D. et al. White matter changes in mild cognitive impairment and AD: A diffusion tensor  
488 imaging study. *Neurobiol. Aging* 27, 663–672 (2006).
- 489 Mielke, M. M. et al. Fornix integrity and hippocampal volume predict memory decline and  
490 progression to Alzheimer's disease. *Alzheimers Dement. J. Alzheimers Assoc.* 8, 105–113 (2012).
- 491 Mitchell, A. J. & Shiri-Feshki, M. Rate of progression of mild cognitive impairment to dementia –  
492 meta-analysis of 41 robust inception cohort studies. *Acta Psychiatr. Scand.* 119, 252–265 (2009).
- 493 Mori, S., Crain, B. J., Chacko, V. P. & van Zijl, P. C. Three-dimensional tracking of axonal



- 494 projections in the brain by magnetic resonance imaging. *Ann. Neurol.* 45, 265–269 (1999).
- 495 Mueller, S. G. et al. The Alzheimer’s disease neuroimaging initiative. *Neuroimaging Clin. N. Am.*  
496 15, 869–877, xi–xii (2005).
- 497 Petersen, R. C. et al. Prevalence of mild cognitive impairment is higher in men The Mayo Clinic  
498 Study of Aging. *Neurology* 75, 889–897 (2010).
- 499 Preti, M. G. et al. Assessing Corpus Callosum Changes in Alzheimer’s Disease: Comparison between  
500 Tract-Based Spatial Statistics and Atlas-Based Tractography. *PLOS ONE* 7, e35856 (2012).
- 501 Rapp, M. A., & Reischies, F. M. (2005). Attention and executive control predict Alzheimer disease  
502 in late life: results from the Berlin Aging Study (BASE). *The American Journal of Geriatric*  
503 *Psychiatry*, 13(2), 134-141.
- 504 Ritter, K. et al. Multimodal prediction of conversion to Alzheimer’s disease based on incomplete  
505 biomarkers\*. *Alzheimers Dement. Diagn. Assess. Dis. Monit.* 1, 206–215 (2015).
- 506 Rose, S. et al. Loss of connectivity in Alzheimer’s disease: an evaluation of white matter tract  
507 integrity with colour coded MR diffusion tensor imaging. *J. Neurol. Neurosurg. Psychiatry* 69, 528–  
508 530 (2000).
- 509 Rozzini, L. et al. Conversion of amnesic Mild Cognitive Impairment to dementia of Alzheimer type  
510 is independent to memory deterioration. *Int. J. Geriatr. Psychiatry* 22, 1217–1222 (2007).
- 511 Salat, D. H. et al. White matter pathology isolates the hippocampal formation in Alzheimer’s disease.  
512 *Neurobiol. Aging* 31, 244–256 (2010).
- 513 Schmidtke, K. & Hermeneit, S. High rate of conversion to Alzheimer’s disease in a cohort of  
514 amnesic MCI patients. *Int. Psychogeriatr.* 20, 96–108 (2008).

## Progressive brain disconnection in AD

- 515 Senanarong, V., Cummings, J. L., Fairbanks, L., Mega, M., Masterman, D. M., O'connor, S. M., &  
516 Strickland, T. L. (2003). Agitation in Alzheimer's disease is a manifestation of frontal lobe  
517 dysfunction. *Dementia and geriatric cognitive disorders*, 17(1-2), 14-20.
- 518 Shehzad, Z. et al. A multivariate distance-based analytic framework for connectome-wide association  
519 studies. *NeuroImage* 93, Part 1, 74–94 (2014).
- 520 Small, B. J., Mobly, J. L., Laukka, E. J., Jones, S., & Bäckman, L. (2003). Cognitive deficits in  
521 preclinical Alzheimer's disease. *Acta Neurologica Scandinavica*, 107(s179), 29-33.
- 522 Small, S. A., Perara, G., DeLaPaz, R., Mayeux, R., & Stern, Y. (1999). Differential regional  
523 dysfunction of the hippocampal formation among elderly with memory decline and Alzheimer's  
524 disease. *Annals of Neurology*, 45, 466–472.
- 525 Smith, C. D. et al. White matter diffusion alterations in normal women at risk of Alzheimer's disease.  
526 *Neurobiol. Aging* 31, 1122–1131 (2010).
- 527 Storandt, M. (2008). Cognitive deficits in the early stages of Alzheimer's disease. *Current Directions*  
528 *in Psychological Science*, 17(3), 198-202.
- 529 Stricker, N. H. et al. Decreased white matter integrity in late-myelinating fiber pathways in  
530 Alzheimer's disease supports retrogenesis. *NeuroImage* 45, 10–16 (2009).
- 531 Teipel, S. et al. Multimodal imaging in Alzheimer's disease: validity and usefulness for early  
532 detection. *Lancet Neurol.* 14, 1037–1053 (2015).
- 533 Tierney, M. C., Szalai, J. P., Snow, W. G., & Fisher, R. H. (1996). The prediction of Alzheimer  
534 disease: The role of patient and informant perceptions of cognitive deficits. *Archives of Neurology*,  
535 53, 423–427

- 536 Wee, C.-Y., Yap, P.-T., Shen, D. & Alzheimer's Disease Neuroimaging Initiative. Prediction of  
537 Alzheimer's disease and mild cognitive impairment using cortical morphological patterns. *Hum.*  
538 *Brain Mapp.* 34, 3411–3425 (2013).
- 539 Westman, E. et al. Sensitivity and Specificity of Medial Temporal Lobe Visual Ratings and  
540 Multivariate Regional MRI Classification in Alzheimer's Disease. *PLOS ONE* 6, e22506 (2011).
- 541 Whittaker, K. W., Burdon, M. A. & Shah, P. Visual field loss and Alzheimer's disease. *Eye* 16, 206–  
542 208 (2002).
- 543 Wimo, A., Ljunggren, G. & Winblad, B. Costs of dementia and dementia care: a review. *Int. J.*  
544 *Geriatr. Psychiatry* 12, 841–856 (1997).
- 545 Y. et al. Regional coherence changes in the early stages of Alzheimer's disease: A combined  
546 structural and resting-state functional MRI study. *NeuroImage* 35, 488–500 (2007).
- 547 Zapala, M. A. & Schork, N. J. Multivariate regression analysis of distance matrices for testing  
548 associations between gene expression patterns and related variables. *Proc. Natl. Acad. Sci. U. S. A.*  
549 103, 19430–19435 (2006).
- 550 Zhang, S. et al. in *Cochrane Database of Systematic Reviews* (John Wiley & Sons, Ltd, 2014).
- 551 Zhou, Y. et al. Abnormal connectivity in the posterior cingulate and hippocampus in early  
552 Alzheimer's disease and mild cognitive impairment. *Alzheimers Dement.* 4, 265–270 (2008).

**Progressive brain disconnection in AD**

553 **Table I: ADNI subjects within each group**

554 HC=Healthy controls, EMCI: Early mild cognitive impairment; LMCI=Late mild cognitive

555 impairment; AD= Alzheimer disease; M=Male, F=Female.

556

| HC               |            |            | EMCI             |            |            | LMCI             |            |            | AD               |            |            |
|------------------|------------|------------|------------------|------------|------------|------------------|------------|------------|------------------|------------|------------|
| <i>SubjectId</i> | <i>Sex</i> | <i>Age</i> | <i>SubjectId</i> | <i>Sex</i> | <i>Age</i> | <i>SubjectId</i> | <i>Sex</i> | <i>Age</i> | <i>SubjectId</i> | <i>Sex</i> | <i>Age</i> |
| 003_S_4119       | M          | 79         | 003_S_2374       | F          | 81         | 003_S_0908       | F          | 70         | 003_S_4373       | F          | 71         |
| 003_S_4839       | M          | 66         | 007_S_2394       | M          | 69         | 003_S_4354       | M          | 76         | 003_S_5165       | M          | 79         |
| 007_S_4488       | M          | 73         | 016_S_4575       | F          | 62         | 016_S_4584       | F          | 78         | 003_S_5187       | F          | 62         |
| 007_S_4516       | M          | 72         | 021_S_2077       | M          | 81         | 016_S_4646       | F          | 61         | 005_S_4707       | M          | 68         |
| 007_S_4620       | M          | 77         | 021_S_2100       | F          | 88         | 016_S_4902       | F          | 75         | 005_S_4910       | F          | 82         |
| 016_S_4121       | M          | 89         | 021_S_2125       | F          | 78         | 021_S_4402       | F          | 73         | 005_S_5038       | M          | 82         |
| 021_S_4558       | F          | 71         | 021_S_2142       | F          | 83         | 021_S_4633       | F          | 73         | 005_S_5119       | F          | 77         |
| 029_S_4279       | M          | 84         | 021_S_4419       | F          | 65         | 021_S_4857       | M          | 68         | 007_S_4568       | F          | 71         |

|            |   |    |            |   |    |            |   |    |            |   |    |
|------------|---|----|------------|---|----|------------|---|----|------------|---|----|
| 029_S_4290 | M | 74 | 021_S_4659 | M | 86 | 027_S_4729 | F | 78 | 007_S_4911 | M | 75 |
| 029_S_4384 | M | 62 | 021_S_4744 | F | 73 | 027_S_4757 | F | 63 | 007_S_5196 | F | 73 |
| 029_S_4385 | F | 68 | 029_S_2370 | F | 64 | 027_S_4804 | M | 80 | 016_S_4591 | F | 66 |
| 029_S_4585 | M | 66 | 029_S_2395 | M | 73 | 027_S_4869 | M | 77 | 016_S_4887 | M | 75 |
| 029_S_4652 | M | 79 | 029_S_4327 | M | 83 | 027_S_4873 | M | 83 | 016_S_4963 | F | 72 |
| 057_S_0934 | F | 77 | 029_S_5135 | M | 77 | 027_S_4936 | M | 78 | 016_S_5057 | M | 75 |
| 094_S_4234 | M | 70 | 094_S_2201 | F | 64 | 027_S_4943 | M | 76 | 016_S_5251 | F | 66 |
| 094_S_4459 | F | 68 | 094_S_2216 | M | 69 | 027_S_4955 | M | 72 | 021_S_4718 | M | 79 |
| 094_S_4460 | F | 67 | 094_S_2238 | M | 69 | 052_S_4626 | M | 69 | 021_S_4924 | M | 77 |
| 094_S_4503 | F | 72 | 094_S_2367 | M | 75 | 052_S_4807 | F | 72 | 027_S_4801 | M | 78 |
| 094_S_4649 | M | 66 | 094_S_4434 | M | 68 | 052_S_4945 | M | 57 | 027_S_4802 | M | 83 |
| 098_S_4002 | F | 74 | 098_S_2052 | M | 74 | 057_S_4888 | M | 75 | 027_S_4938 | M | 71 |
| 098_S_4003 | F | 72 | 098_S_2071 | M | 85 | 057_S_4909 | F | 78 | 027_S_4962 | F | 80 |

**Progressive brain disconnection in AD**

|            |   |    |            |   |    |            |   |    |            |   |    |
|------------|---|----|------------|---|----|------------|---|----|------------|---|----|
| 098_S_4018 | M | 76 | 099_S_4205 | F | 84 | 094_S_4162 | F | 71 | 027_S_4964 | M | 81 |
| 098_S_4050 | M | 77 | 099_S_4498 | F | 80 | 094_S_4295 | F | 70 | 052_S_5062 | F | 71 |
| 098_S_4275 | M | 73 | 109_S_2110 | F | 68 | 094_S_4630 | F | 66 | 094_S_4089 | M | 74 |
| 098_S_4506 | M | 72 | 109_S_2111 | M | 72 | 109_S_4471 | M | 73 | 094_S_4737 | F | 74 |
| 099_S_4076 | F | 75 | 109_S_2200 | F | 76 | 109_S_4531 | M | 74 | 098_S_4201 | F | 64 |
| 127_S_4148 | M | 73 | 109_S_4380 | M | 72 | 126_S_4458 | F | 76 | 098_S_4215 | M | 82 |
| 127_S_4198 | F | 78 | 109_S_4455 | M | 64 | 126_S_4507 | M | 78 | 109_S_4378 | M | 80 |
| 127_S_4604 | M | 65 | 109_S_4594 | M | 62 | 126_S_4675 | M | 80 | 126_S_4494 | M | 71 |
| 127_S_4645 | F | 76 | 126_S_2360 | M | 64 | 126_S_4712 | M | 74 | 127_S_4749 | F | 78 |
| 127_S_4843 | F | 73 | 126_S_4891 | M | 60 | 126_S_4743 | M | 70 | 127_S_4992 | F | 64 |
| 129_S_0778 | M | 80 | 127_S_4301 | M | 75 | 126_S_4896 | M | 68 | 127_S_5028 | M | 62 |
| 129_S_4369 | M | 70 | 127_S_4624 | F | 78 | 127_S_4197 | M | 79 | 127_S_5056 | M | 85 |
| 129_S_4371 | M | 70 | 127_S_4765 | M | 76 | 127_S_4210 | M | 64 | 127_S_5058 | M | 62 |

## Progressive alterations in AD brain connectivity

|            |   |    |            |   |    |            |   |    |            |   |    |
|------------|---|----|------------|---|----|------------|---|----|------------|---|----|
| 129_S_4396 | F | 81 | 129_S_2347 | M | 73 | 127_S_4240 | M | 71 | 127_S_5067 | M | 81 |
| 131_S_0123 | M | 81 | 129_S_4220 | F | 73 | 129_S_4287 | F | 73 | 127_S_5095 | M | 66 |

557

558

**Progressive brain disconnection in AD**

559 **Table II: t-test and Chi<sup>2</sup> test across groups**

560 HC=Healthy controls, EMCI: Early mild cognitive impairment; LMCI=Late mild cognitive  
561 impairment; AD= Alzheimer disease.

562

|                                   | HC VS EMCI        |                | HC VS LMCI        |                | HC VS AD          |                |
|-----------------------------------|-------------------|----------------|-------------------|----------------|-------------------|----------------|
|                                   | <i>test value</i> | <i>p-value</i> | <i>test value</i> | <i>p-value</i> | <i>test value</i> | <i>p-value</i> |
| <b>Age (t-test)</b>               | 0.0349            | 0.9722         | 0.5539            | 0.5814         | 0.2071            | 0.8365         |
| <b>Sex (Chi<sup>2</sup> test)</b> | 0.2338            | 0.6287         | 0.2338            | 0.6287         | 0.2338            | 0.6287         |

563

564

565

566



567 **Table III: Further information about ADNI group classification.**

568 HC=Healthy controls, EMCI: Early mild cognitive impairment; LMCI=Late mild cognitive  
 569 impairment; AD= Alzheimer disease; LMIIS=Logical Memory II subscale; MMSE= Mini Mental  
 570 State Examination; CDR= Clinical Dementia Rating.

|                                   | HC       | EMCI         | LMCI         | AD       |
|-----------------------------------|----------|--------------|--------------|----------|
| LMIIIS (maximum of 25 points)     |          |              |              |          |
| Education $\geq 16$ years         | $\geq 9$ | [9-11]       | $\leq 8$     | $\leq 8$ |
| Education [8-15] years            | $\geq 5$ | [5-9]        | $\leq 4$     | $\leq 4$ |
| Education [0-7] years             | $\geq 3$ | [3-6]        | $\leq 2$     | $\leq 2$ |
| MMSE (Maximum of 30 points)       | [24-30]  | [24-30]      | [24-30]      | [20-26]  |
| CDR                               | 0        | 0.5          | 0.5          | 0.5 or 1 |
| Memory Box Score (subpart of CDR) | 0        | at least 0.5 | at least 0.5 | NA       |

571

572

**Progressive brain disconnection in AD**

573 **Table IV: p-values associated to each module from the brain hierarchical atlas.**

574 HC=Healthy controls, EMCI: Early mild cognitive impairment; LMCI=Late mild cognitive

575 impairment; AD= Alzheimer disease; \*  $0.01 < p < 0.05$ ; \*\*  $0.005 < p < 0.01$ ; \*\*\*  $p < 0.005$ .

576

| Module | HC vs EMCI | HC vs LMCI | HC vs AD |
|--------|------------|------------|----------|
| 1      | 0.956      | 0.753      | 0.023*   |
| 2      | 0.956      | 0.466      | 0.049*   |
| 3      | 0.956      | 0.441      | 0.049*   |
| 4      | 0.880      | 0.532      | 0.031*   |
| 5      | 0.859      | 0.689      | 0.973    |
| 6      | 0.859      | 0.438      | 0.546    |
| 7      | 0.956      | 0.900      | 0.503    |
| 8      | 0.859      | 0.449      | 0.031*   |
| 9      | 0.859      | 0.600      | 0.591    |

|    |       |         |          |
|----|-------|---------|----------|
| 10 | 0.956 | 0.900   | 0.627    |
| 11 | 0.956 | 0.438   | 0.759    |
| 12 | 0.956 | 0.466   | 0.031*   |
| 13 | 0.859 | 0.600   | 0.531    |
| 14 | 0.956 | 0.438   | 0.006**  |
| 15 | 0.956 | 0.753   | 0.031*   |
| 16 | 0.956 | 0.986   | 0.031*   |
| 17 | 0.890 | 0.898   | 0.546    |
| 18 | 0.399 | 0.007** | 0.002*** |
| 19 | 0.956 | 0.438   | 0.109    |
| 20 | 0.956 | 0.986   | 0.972    |

577

578

**Progressive brain disconnection in AD**

579 **Table V: Examples of pseudo F-statistics, between-group and within-group sum of squares.**

580 Three different situations: Node 10, that does not provide any significant change in pattern  
 581 connectivity; Node 16, significantly different in stage III; and Node 18, with pattern connectivity  
 582 significantly different in stages II and III.

583 HC=Healthy controls, EMCI: Early mild cognitive impairment; LMCI=Late mild cognitive  
 584 impairment; AD= Alzheimer disease

| Module | HC vs EMCI |            |            | HC vs LMCI |            |            | HC vs AD |            |            |
|--------|------------|------------|------------|------------|------------|------------|----------|------------|------------|
|        | <i>F</i>   | <i>SSA</i> | <i>SSW</i> | <i>F</i>   | <i>SSA</i> | <i>SSW</i> | <i>F</i> | <i>SSA</i> | <i>SSW</i> |
| 10     | 0.527      | 0.008      | 1.028      | 0.630      | 0.008      | 0.940      | 0.894    | 0.012      | 0.941      |
| 16     | 0.380      | 0.019      | 3.457      | 0.285      | 0.014      | 3.404      | 3.410    | 0.173      | 3.550      |
| 18     | 3.057      | 0.024      | 0.558      | 5.854      | 0.049      | 0.595      | 6.018    | 0.051      | 0.588      |

585

586

587 **Figure 1: Details of group size and population demographic data.** Alzheimer's disease  
588 progression is addressed across three stages. 4 groups of 36 subjects each show different stages of  
589 AD (Healthy, Early and Late MCI, Alzheimer) under ADNI criterion. All groups have been balanced  
590 with regard to age, sex and years of education. Brain connectivity patterns and its relation with  
591 disease progression is accomplished by comparing the healthy control group with the rest of groups,  
592 i.e. NC vs EMCI (bottom-left, stage I), NC vs LMCI (bottom-center, stage II) and NC vs AD  
593 (bottom-right, stage III).

594

## Progressive brain disconnection in AD

595 **Figure 2: Schematic description of the method used to find brain modules connectivity patterns**  
596 **that are statistically different between groups.** In a first step (top-red), brain images are prepared  
597 for preprocessing by using standard techniques (Eddy current and correction for head motion) and  
598 fibers connectivity matrices are computed by Continuous Tracking (FACT) algorithm. In the next  
599 step (Distance matrix calculation in green), the connectivity patterns of subjects for a given module  
600 are used to construct the distance matrix by means of Pearson correlation coefficients. Once the  
601 distance matrix for a given module is calculated, we test (bottom-blue) whether the variability in  
602 distance among different groups is statistically related with disease, for which we compare the  
603 observed results with a simulated distribution given by  $N_{\text{perm}}$  permutations of the labels. We repeat  
604 this operation for every module. We finally apply a multiple comparison correction to control the rate  
605 of false discoveries (bottom-black)

606

607 **Figure 3: Brain mapping of p-values corresponding to modules that become statistically**  
608 **different with regard to connectivity profile as disease progresses.** Brain disconnection as disease  
609 progresses is quantitatively addressed by looking at the p-values of the modules. At first stages (HC  
610 vs EMC, top), fibers deterioration is not sufficient to yield significant changes in modules  
611 connectivity patterns. In a later stage (Control vs LMCI - middle), the connectivity pattern of module  
612 18, which involves parts of the hippocampus, entorhinal cortex, amygdala and other memory-related  
613 areas, disconnects statistically with respect to healthy subjects (p-val = 0.007). Such connectivity  
614 differences are after spread to the rest of the brain at final stages (Control vs AD, bottom), showing a  
615 clear deterioration given by a stronger decrease in p-values.

616

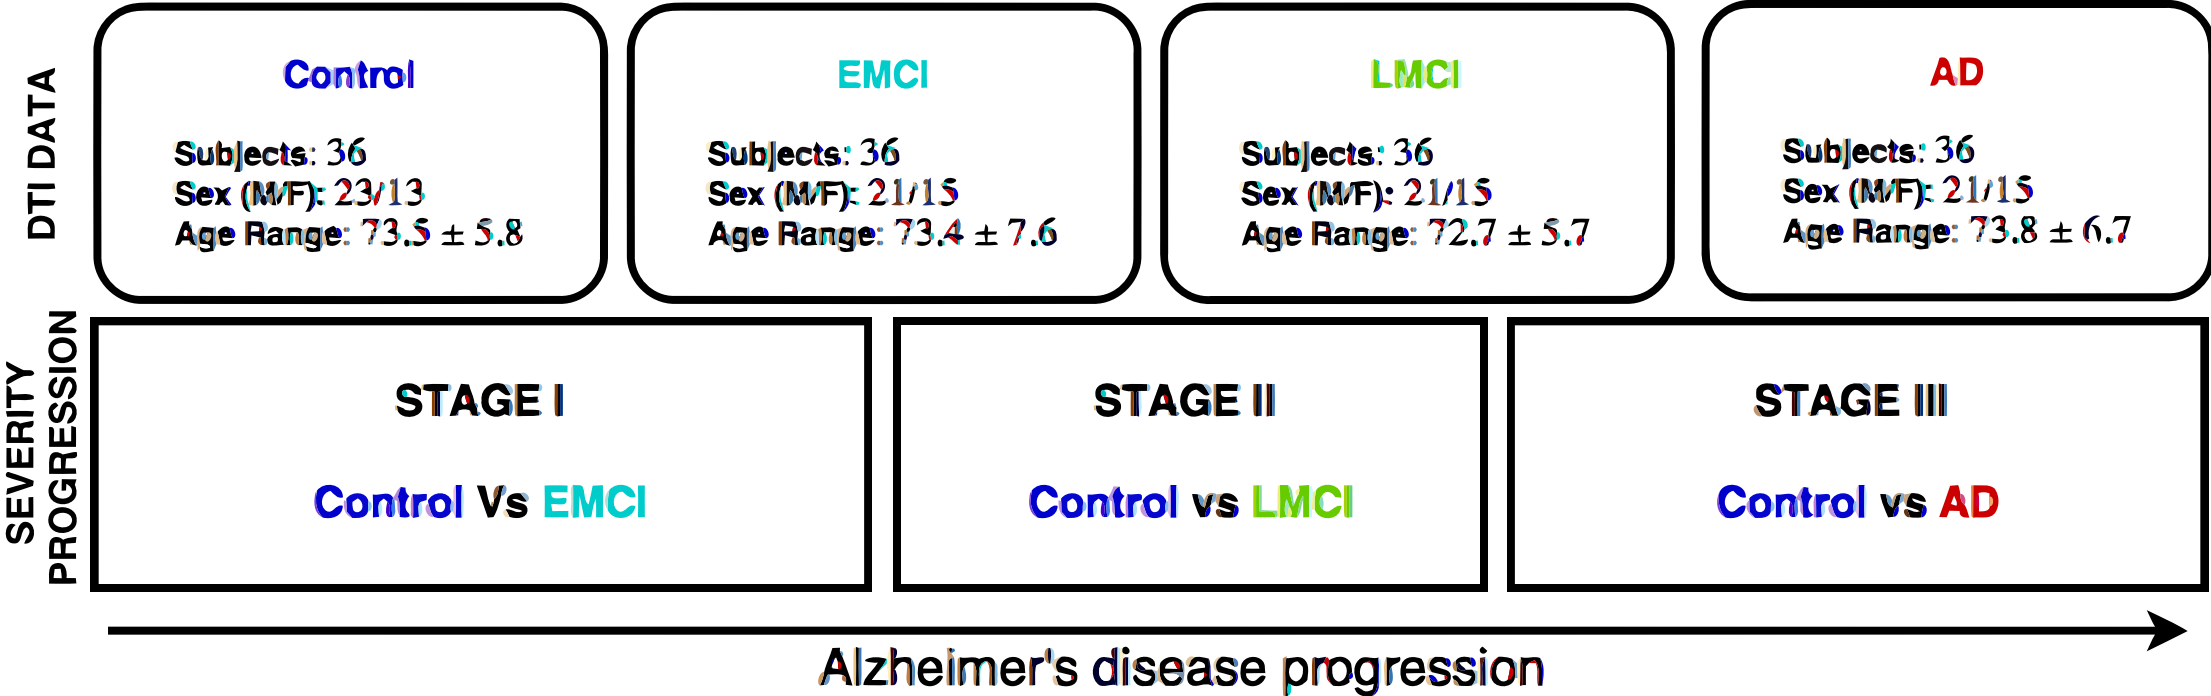



## IMAGE PREPROCESSING

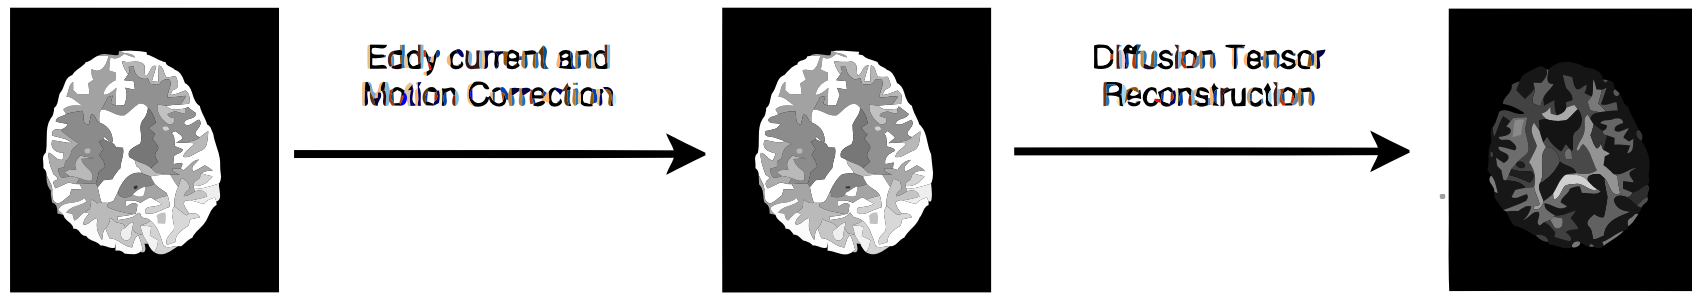

bioRxiv preprint doi: <https://doi.org/10.1101/105270>; this version posted February 2, 2017. The copyright holder for this preprint (which was not certified by peer review) is the author/funder, who has granted bioRxiv a license to display the preprint in perpetuity. It is made available under aCC-BY 4.0 International license.

## Fibre number Data

## Fibre pattern 1st region

## DISTANCE MATRIX CALCULATION

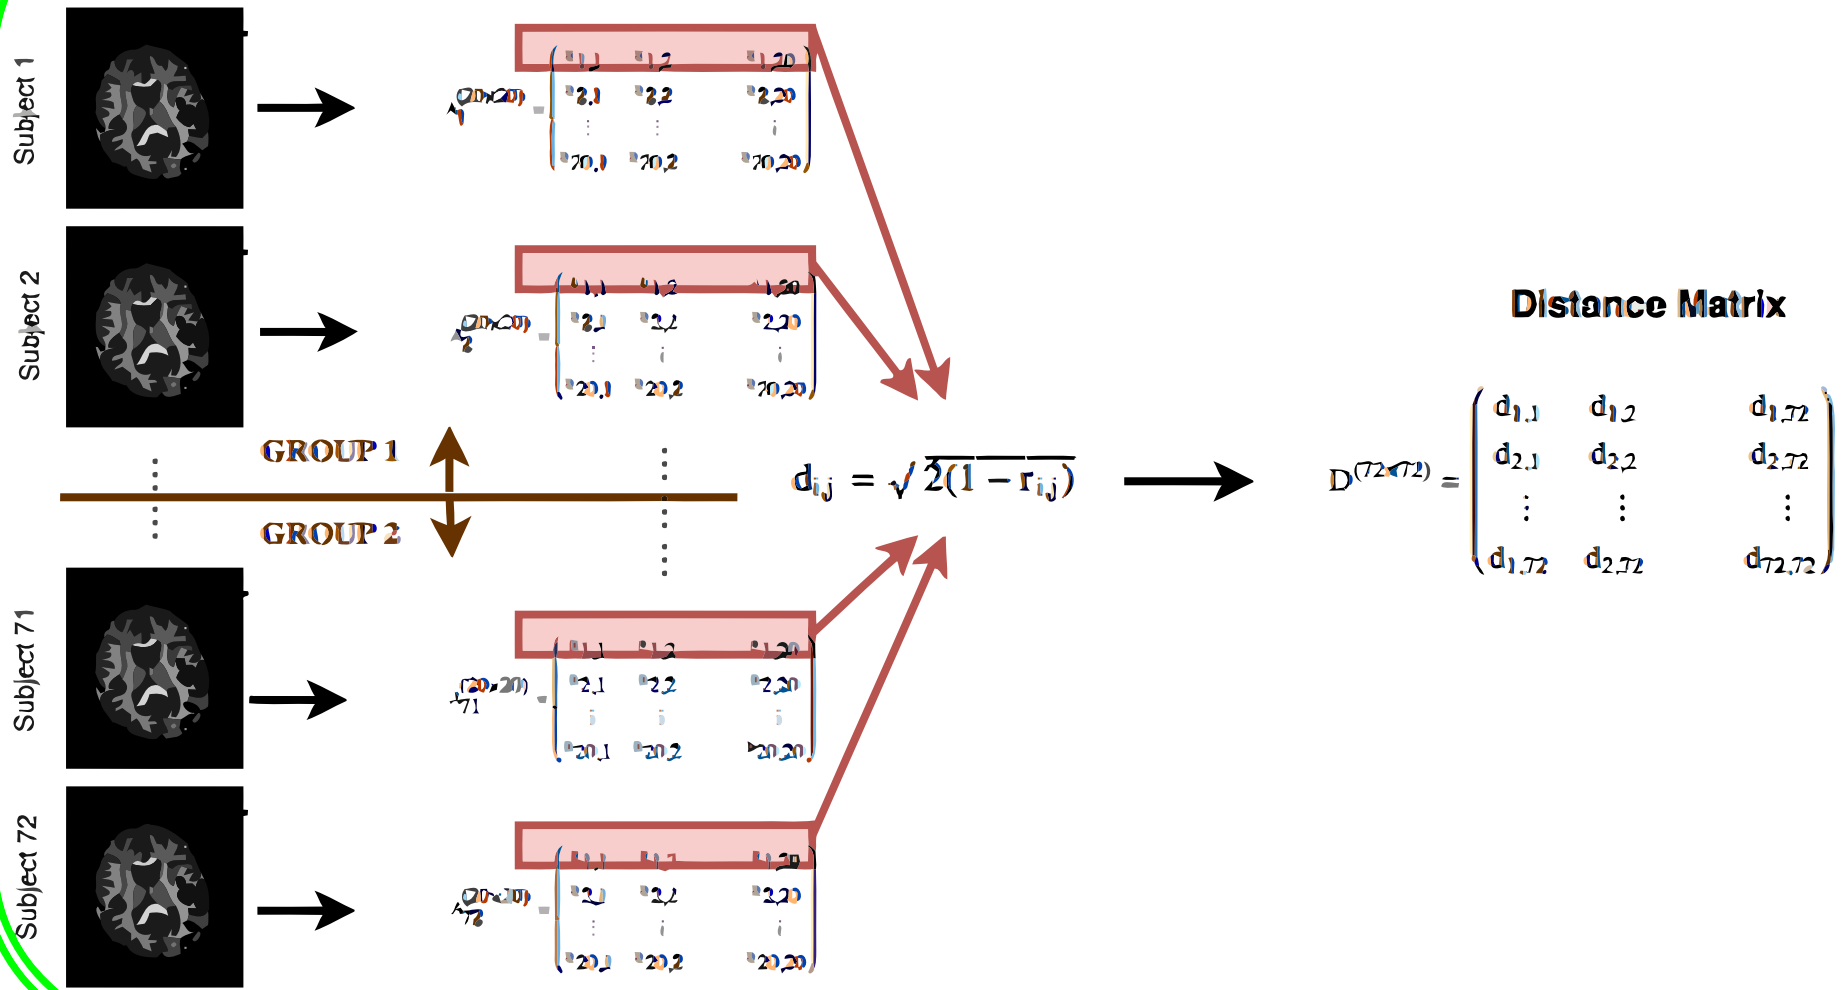

REPEAT WITH ALL REGIONS

Pseudo F-stat measured:

$$F \sim \frac{\sum_{i=1}^{N-1} \sum_{j=i+1}^N d_{ij}^2}{\sum_{i=1}^{N-1} \sum_{j=i+1}^N d_{ij}^2 \epsilon_{ij}} - 1$$

Recalculate F from permuted data

## MULTIVARIATE REGRESSION

$$p_{val} = \frac{\#F_{permutations} > F}{N_{permutations}}$$

## FALSE DISCOVERY RATE CORRECTIONS

$$FDR = \left\langle \frac{v}{v+s} \right\rangle = \left\langle \frac{v}{R} \right\rangle$$

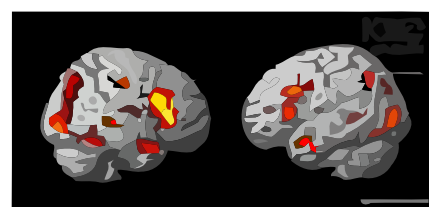

NO significant modules

bioRxiv preprint doi: <https://doi.org/10.1101/105270>; this version posted February 2, 2017. The copyright holder for this preprint (which was not certified by peer review) is the author/funder, who has granted bioRxiv a license to display the preprint in perpetuity. It is made available under aCC-BY 4.0 International license.

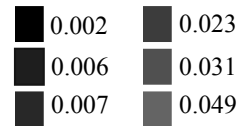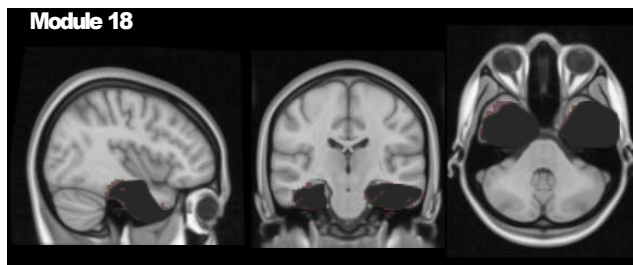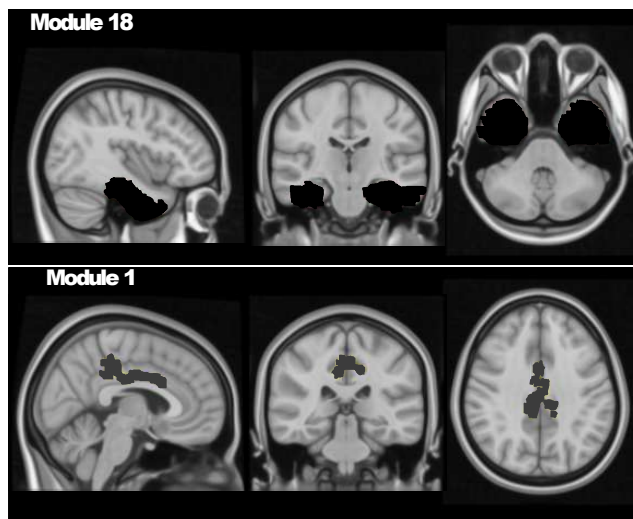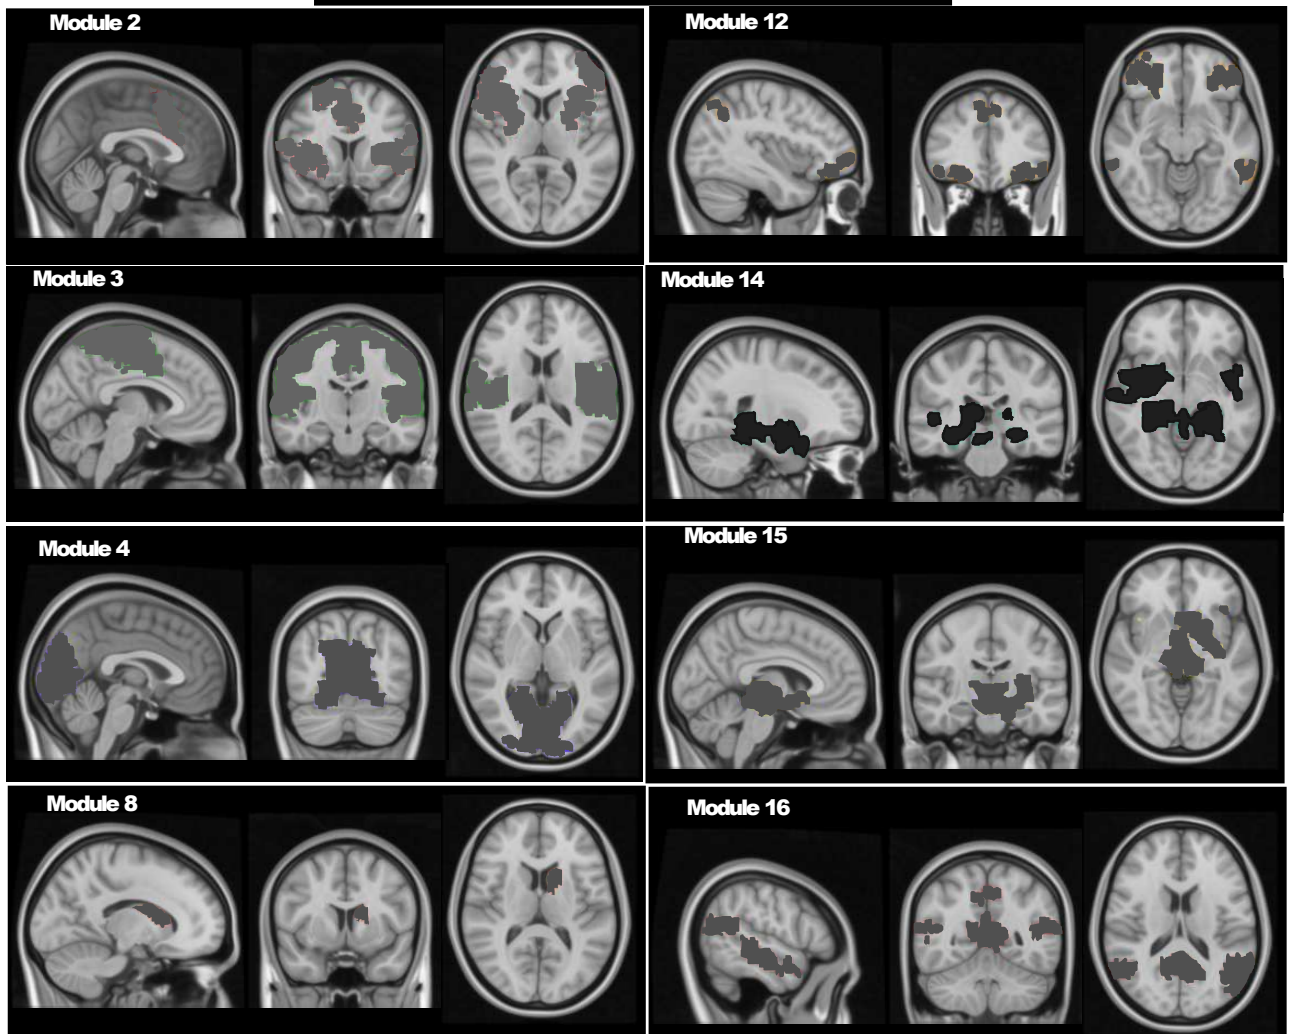

Source: https://www.biorxiv.org/content/10.1101/105270v1.full.pdf
